# Supplementary material for: Magneto-thermochromic coupling Janus sphere for dual response display
Source: Royal Society of Chemistry journal article supplement (doi:10.1039/c9ra02892g), 2019-01-01
Supplement: c9ra02892g1.pdf [file c9ra02892g1.pdf]

## Supporting Information

### Magneto-thermochromic Coupling Janus Sphere for Dual Response

#### Display

Yiwen Cui, Yu Wang\*, Jie Wu, Xiaokang He, Shouhu Xuan\* and Xinglong Gong\*

CAS Key Laboratory of Mechanical Behavior and Design of Materials, Department of Modern Mechanics, CAS Center for Excellence in Complex System Mechanics, University of Science and Technology of China, Hefei, Anhui 230027, China.

E-mail: gongxl@ustc.edu.cn (X. Gong); Tel: +86 551 63600419.

E-mail: xuansh@ustc.edu.cn (S.Xuan); Tel: +8655163601702.

E-mail: wyu@ustc.edu.cn(Y. Wang); Tel: +8655163601236.

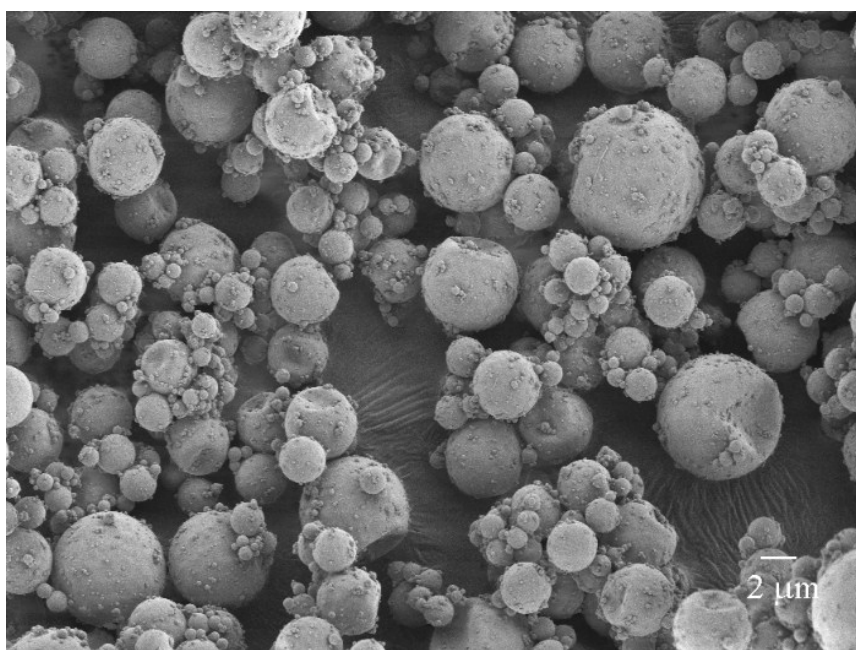

Fig. S1 Scanning electron microscope (SEM) image of blue thermochromic particles.

Table 1: Composition of red thermochromic particles

| CAS         | Chemical Name                                                                                                                                                                                                         | w/w (%) |
|-------------|-----------------------------------------------------------------------------------------------------------------------------------------------------------------------------------------------------------------------|---------|
| 192190-91-3 | 1-[4-[(E)-2-[4-(dibutylamino)phenyl]ethenyl]phenyl]-2,2,2-trifluoroethanone                                                                                                                                           | 45%     |
| 9002-88-4   | poly(ethylene)                                                                                                                                                                                                        | 5%      |
| 52238-92-3  | (4E)-4-[[2-chloro-5-(trifluoromethyl)phenyl]hydrazinylidene]-N-[2,5-dichloro-4-[[4Z]-4-[[2-chloro-5-(trifluoromethyl)phenyl]hydrazinylidene]-3-oxonaphthalene-2-carbonyl]amino]phenyl]-3-oxonaphthalene-2-carboxamide | 50%     |

Table 2: Composition of blue thermochromic particles

| CAS         | Chemical Name                                                               | w/w (%) |
|-------------|-----------------------------------------------------------------------------|---------|
| 192190-91-3 | 1-[4-[(E)-2-[4-(dibutylamino)phenyl]ethenyl]phenyl]-2,2,2-trifluoroethanone | 45%     |
| 9002-88-4   | poly(ethylene)                                                              | 5%      |
| 81-77-6     | Vat Blue 4                                                                  | 50%     |
